# Supplementary material for: Comparative Genomics Revealed Genetic Diversity and Species/Strain-Level Differences in Carbohydrate Metabolism of Three Probiotic Bifidobacterial Species
Source: Hindawi journal article supplement (doi:10.1155/2015/567809), 2015-01-01
Supplement: f1 [file 567809.f1.pdf]

1 **Supplementary file 1 – Phylogenetic tree based on (a) 16S rRNA gene sequences**  
 2 **and (b) whole genes of *B. longum***  
 3 Each phylogenetic tree was constructed using (a) the ClustalW program and (b) the  
 4 PGAP pipeline [21] via the neighbour-joining method. The numbers in parentheses  
 5 indicate the (A) locus\_tag and (B) accession number

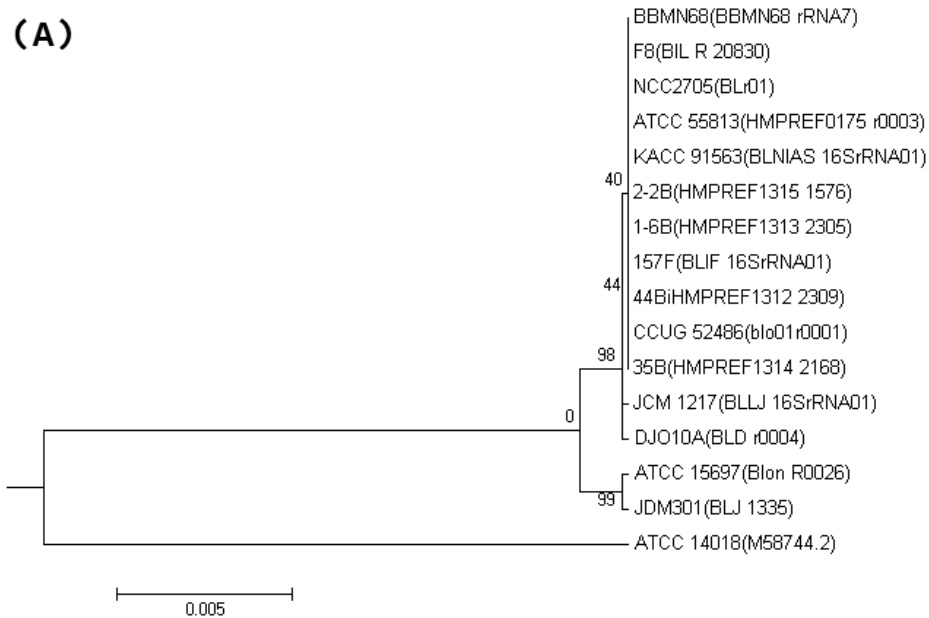

6

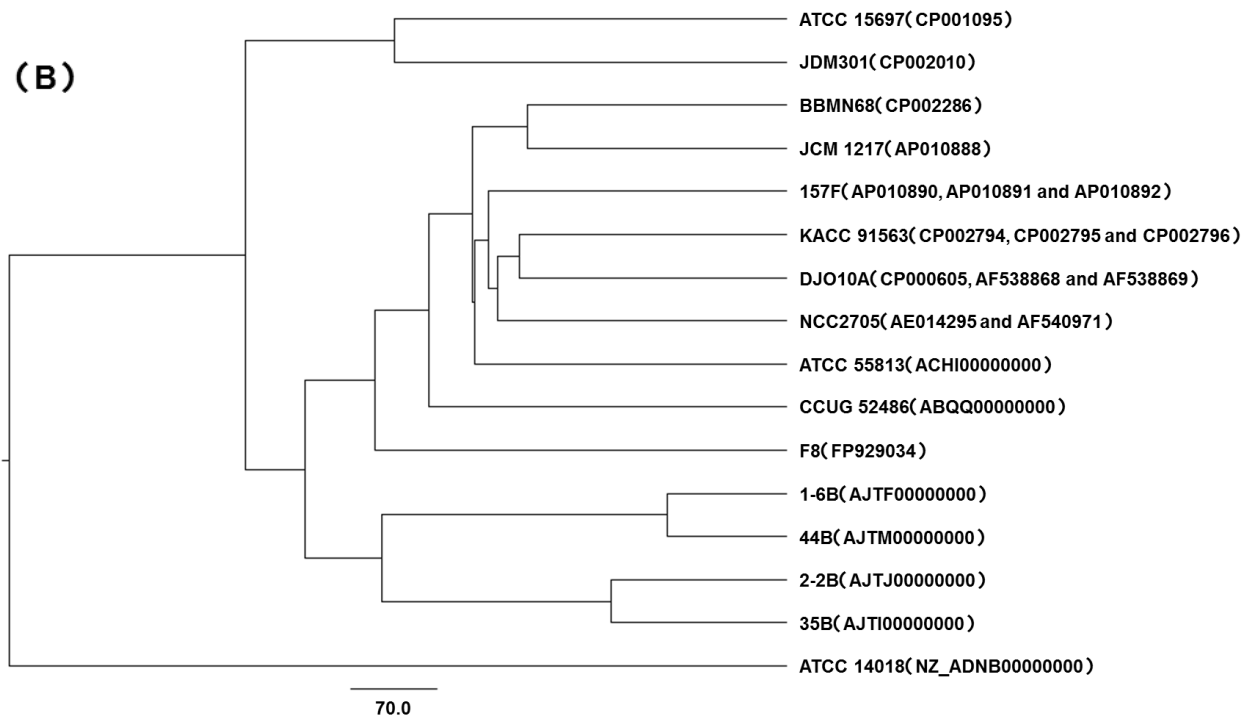

7

8 **Supplementary file 2 – Phylogenetic tree based on (a) 16S rRNA gene sequences**  
 9 **and (b) whole genes of *B. breve***

10 Each phylogenetic tree was constructed using (A) the ClustalW program and (B) the  
 11 PGAP pipeline [21] via the neighbour-joining method. The numbers in parentheses  
 12 indicate the (A) locus\_tag and (B) accession number.

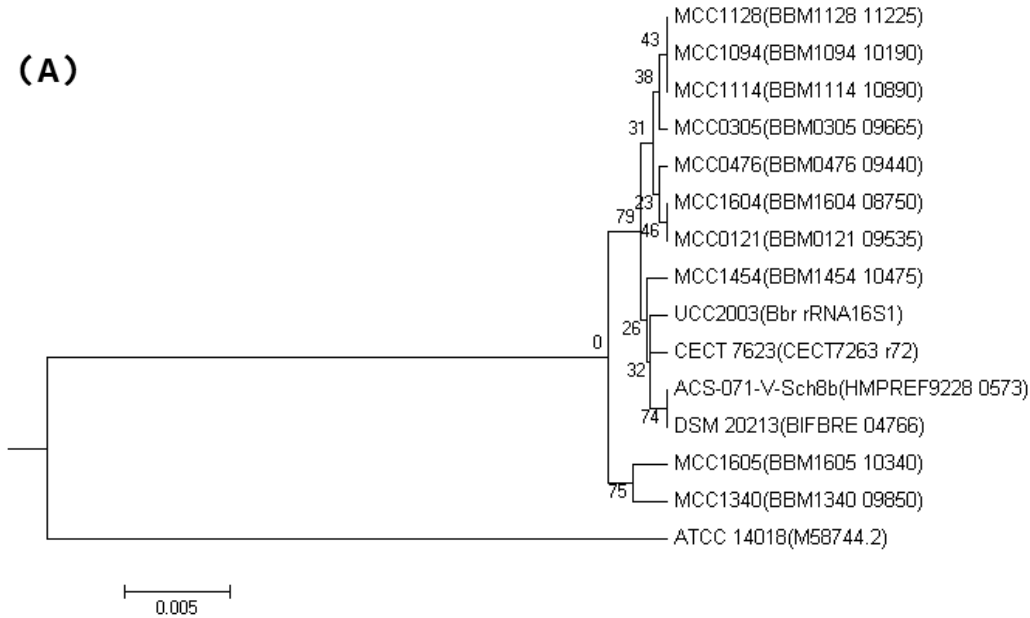

13

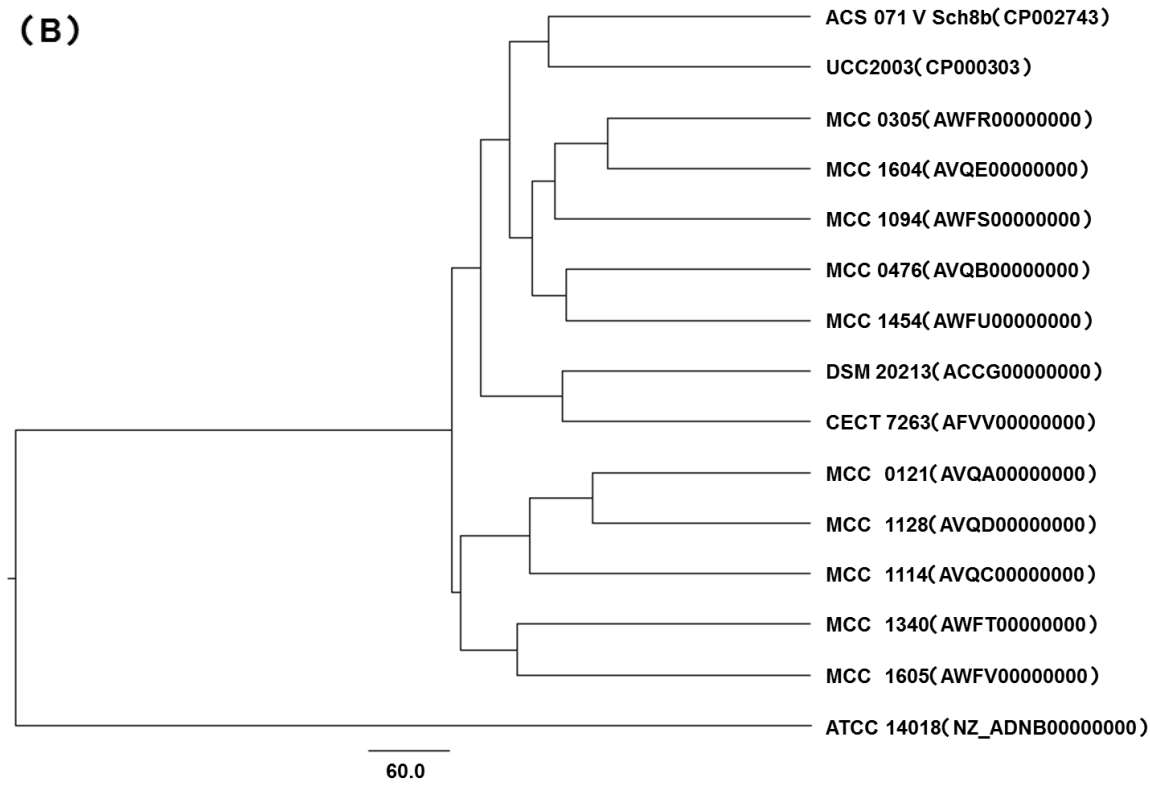

14

15 **Supplementary file 3 – Phylogenetic tree based on (a) 16S rRNA gene sequences**  
 16 **and (b) whole genes of *B. animalis***

17 Each phylogenetic tree was constructed using (A) the ClustalW program and (B) the  
 18 PGAP pipeline [21] via the neighbour-joining method. The numbers in parentheses  
 19 indicate the (A) locus\_tag and (B) accession number.

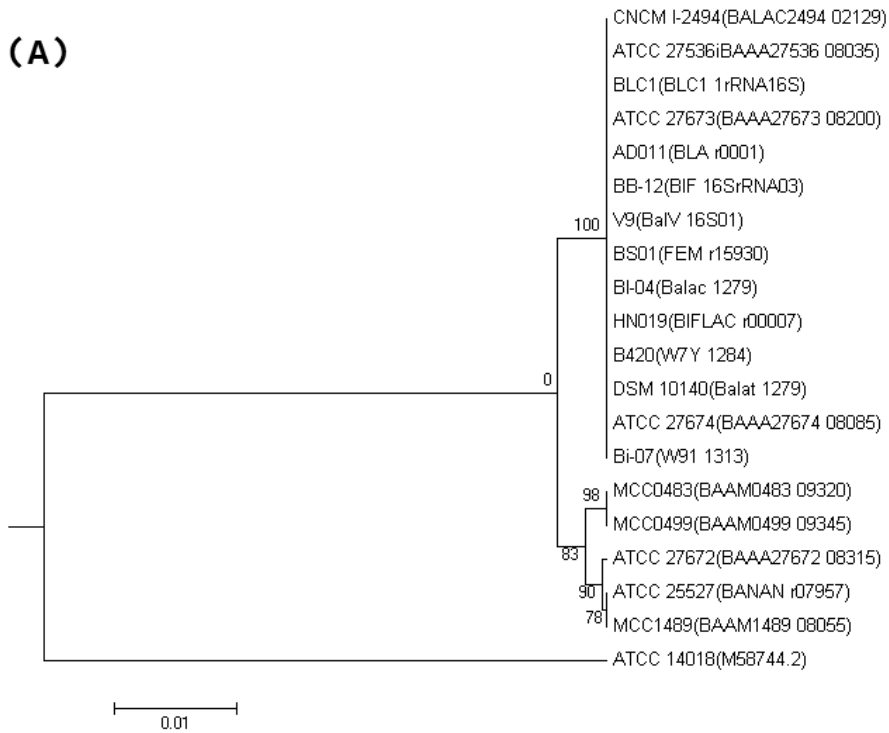

20

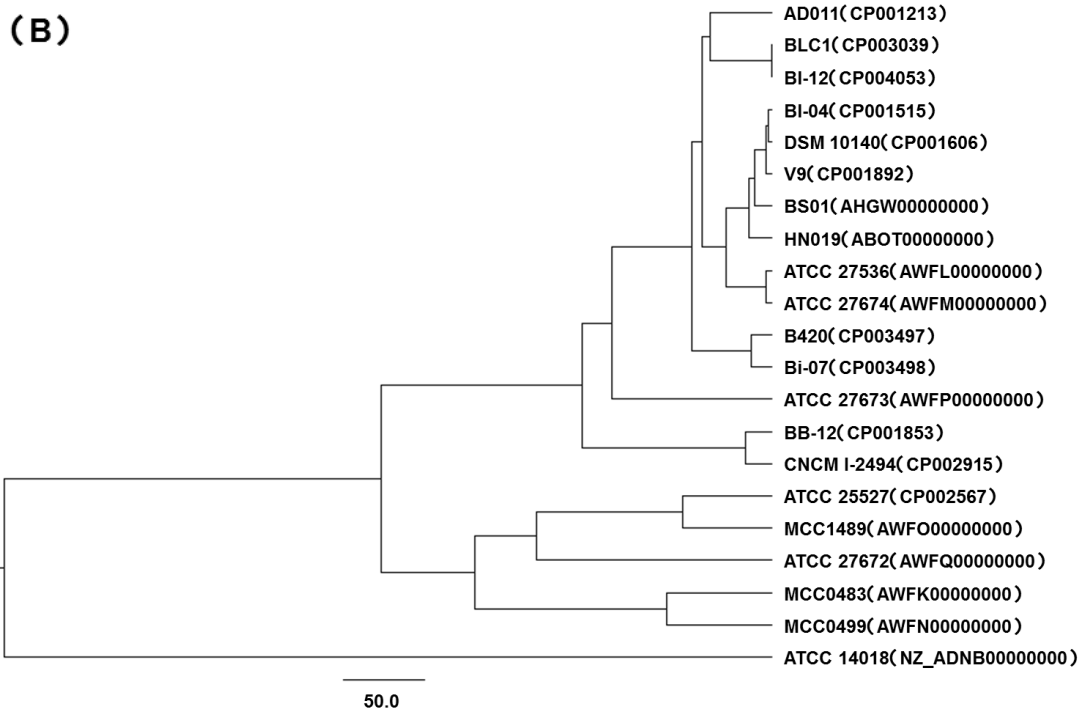

21  
 22

23 **Supplementary file 4 – Pan- and core genome plots for the three analysed species**

24 Solid and open symbols indicate the numbers of pan-genomes and core genomes,

25 respectively. Each colour indicates a different species: red, *B. longum*; orange, *B.*

26 *breve*; green, *B. animalis*.

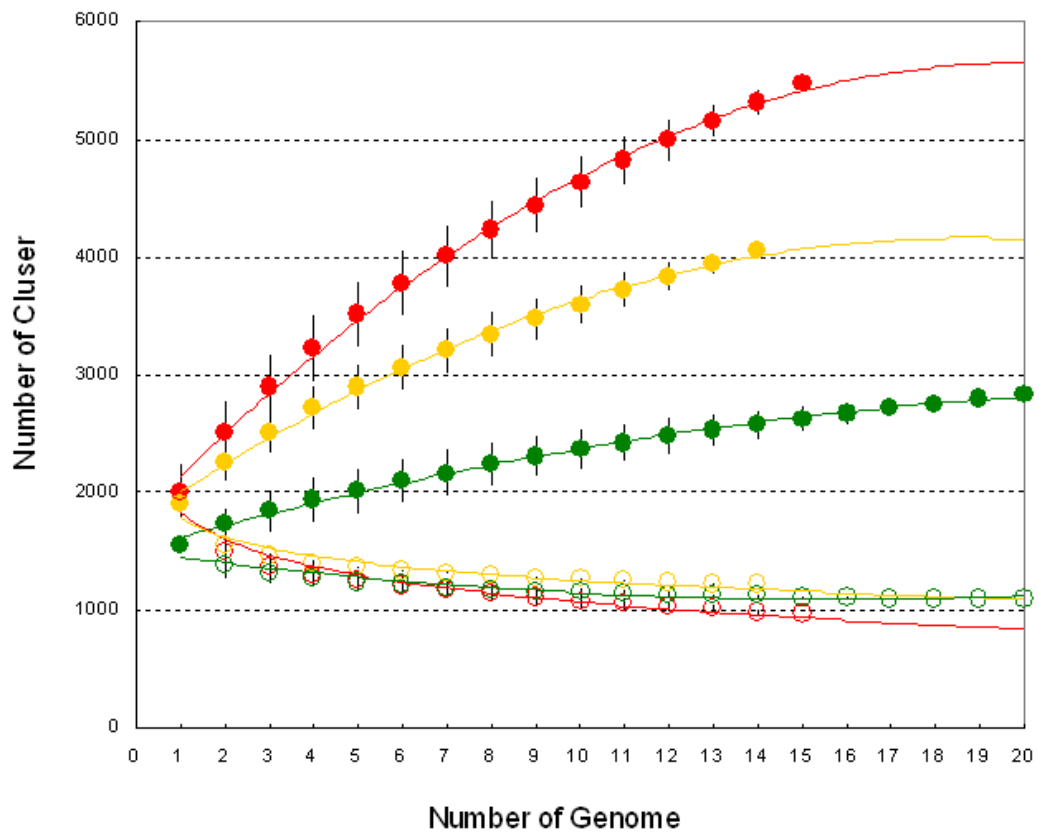

27

28

29 **Supplementary file 5 - Ability of bifidobacteria in the assimilation of human milk**  
 30 **oligosaccharide, lacto-N-tetraose (LNT)**  
 31

| Species                                   | Strain                  | 24 h |      | 48 h |      |
|-------------------------------------------|-------------------------|------|------|------|------|
|                                           |                         | Mean | SD   | Mean | SD   |
| <i>B. longum</i> subsp. <i>longum</i>     | JCM 1217 <sup>T</sup>   | 1.3  | 0.03 | 1.6  | 0.19 |
| <i>B. longum</i> subsp. <i>infantis</i>   | ATCC 15697 <sup>T</sup> | 1.7  | 0.03 | 2.0  | 0.03 |
| <i>B. breve</i>                           | DSM 20213 <sup>T</sup>  | 1.5  | 0.03 | 2.0  | 0.14 |
| <i>B. animalis</i> subsp. <i>animalis</i> | ATCC 25527 <sup>T</sup> | 0.0  | 0.00 | 0.0  | 0.00 |
| <i>B. animalis</i> subsp. <i>lactis</i>   | DSM 10140 <sup>T</sup>  | 0.0  | 0.00 | 0.0  | 0.00 |

32 OD600 after cultivation at 37°C under anaerobic conditions for 24 to 48 h in a  
 33 medium containing 2% of LNT as the sole carbohydrate
